# Supplementary material for: Combining amino acids and carbohydrates into readily biodegradable, task specific ionic liquids
Source: Royal Society of Chemistry journal article supplement (doi:10.1039/d0ra03664a), 2020-01-01
Supplement: d0ra03664a1.pdf [file d0ra03664a1.pdf]

## Supporting Information

### Combining Amino Acids and Carbohydrates into Readily Biodegradable, Task Specific Ionic Liquids

Alina Brzęczek-Szafran<sup>a</sup>, Przemysław Więcek<sup>a</sup>, Maciej Guzik<sup>b</sup>, Anna Chrobok<sup>a</sup>

<sup>a</sup>Department of Chemical Organic Technology and Petrochemistry, Silesian

University of Technology, Krzywoustego 4, 44-100, Gliwice, Poland

<sup>b</sup>Jerzy Haber Institute of Catalysis and Surface Chemistry Polish Academy of

Sciences, Niezapominajek 8, 30-239 Kraków, Poland

#### Table of Contents:

|                                                                                                                                     |            |
|-------------------------------------------------------------------------------------------------------------------------------------|------------|
| <b>Experimental Section</b>                                                                                                         | <b>S2</b>  |
| <b>Synthesis of ILs</b>                                                                                                             | <b>S2</b>  |
| <b>Table 1.</b> Comparison of Knoevenagel process performance indicators achieved in the presence of different amino acid catalysts | <b>S5</b>  |
| <b>Figure 1.</b> Biodegradation of carbohydrate/amino acid based ILs.                                                               | <b>S6</b>  |
| <b>Figure 2.</b> <sup>1</sup> H and <sup>13</sup> C NMR spectra of the [Carb][AAIL]s.                                               | <b>S7</b>  |
| <b>References</b>                                                                                                                   | <b>S13</b> |

## Experimental Section

### Synthesis of ILs

#### Materials

*N*-[2-(D-glucopyranosyl)ethyl]-*N,N,N*-trimethylammonium bromide was synthesized according to an established literature procedure.<sup>1</sup> L-glycine, L-leucine, L-serine, L-arginine, L-tyrosine, L-histidine, L-tryptophan and benzaldehyde were purchased from Sigma-Aldrich. Anion exchange resin (DOWEX® 1×8, 100-200 mesh) was purchased from Acros Organics.

#### General procedure for carbohydrate/amino acid ionic liquid [Carb][AAIL] synthesis

*N*-[2-(D-glucopyranosyl)ethyl]-*N,N,N*-trimethylammonium hydroxide aqueous solution was prepared from *N*-[2-(D-glucopyranosyl)ethyl]-*N,N,N*-trimethylammonium bromide (7.8 mmol) using anion exchange resin (DOWEX®).

The *N*-[2-(D-glucopyranosyl)ethyl]-*N,N,N*-trimethylammonium hydroxide aqueous solution was added dropwise to a 1.2 molar excess of the corresponding amino acid (9.3 mmol) in absolute ethanol (100 mL). The mixture was stirred until no dark brown precipitate formed upon testing with AgNO<sub>3</sub> (12–48 h). After solvent removal (50 °C, 20 mmbar), the residue was dissolved in methanol. The solid amino acid excess was separated and the solvent was evaporated yielding a viscous liquid (67–87%).

**[Carb][Gly]** yield: 86%. <sup>1</sup>H NMR (400 MHz, CD<sub>3</sub>OD) δ 4.39 (d, *J* = 7.8 Hz, 1H), 4.36 (m, 1H), 4.11 (m, 1H), 3.94 (dd, *J* = 11.8, 2.2 Hz, 1H), 3.73 – 3.66 (m, 3H), 3.43 – 3.29 (m, 4H), 3.26 (s, 9H), 3.25 – 3.18 (m, 2H). <sup>13</sup>C NMR (101 MHz, CD<sub>3</sub>OD) δ

180.02, 104.21, 78.27, 78.08, 74.86, 71.53, 67.02, 64.17, 62.68, 54.80, 54.76, 54.72, 46.03.

**[Carb][Leu]** yield: 83%.  $^1\text{H}$  NMR (400 MHz,  $\text{CD}_3\text{OD}$ )  $\delta$  4.33 (d,  $J = 7.8$  Hz, 1H), 4.32 – 4.27 (m, 1H), 4.08 – 3.98 (m, 1H), 3.89 (dd,  $J = 11.8, 2.2$  Hz, 1H), 3.67 – 3.60 (m, 3H), 3.38 – 3.21 (m, 4H), 3.20 (s, 9H), 3.17 (m, 1H), 1.74 (m, 1H), 1.57 (m, 1H), 1.36 (m, 1H), 0.92 (dd,  $J = 7.5, 6.6$  Hz, 6H).  $^{13}\text{C}$  NMR (101 MHz,  $\text{CD}_3\text{OD}$ )  $\delta$  182.65, 104.22, 78.28, 78.09, 74.86, 71.53, 67.02, 64.17, 62.68, 55.98, 54.79, 54.75, 54.71, 45.91, 26.07, 23.69, 22.45.

**[Carb][Ser]** yield: 82%.  $^1\text{H}$  NMR (400 MHz,  $\text{CD}_3\text{OD}$ )  $\delta$  4.39 (d,  $J = 8.0$  Hz, 1H), 4.36 (m, 1H), 4.14 – 4.04 (m, 1H), 3.94 (dd,  $J = 11.8, 2.2$  Hz, 1H), 3.85 (dd,  $J = 11.8, 4.4$  Hz, 2H), 3.69 (m, 3H), 3.42 – 3.27 (m, 4H), 3.26 (s, 9H), 3.23 (m, 1H).  $^{13}\text{C}$  NMR (101 MHz,  $\text{CD}_3\text{OD}$ )  $\delta$  178.11, 104.21, 78.27, 78.08, 74.86, 71.53, 67.03, 65.31, 64.17, 62.68, 58.90, 54.79, 54.76, 54.72.

**[Carb][Arg]** yield: 67%.  $^1\text{H}$  NMR (400 MHz,  $\text{CD}_3\text{OD}$ )  $\delta$  4.28 (d,  $J = 7.8$  Hz, 1H), 4.25 (m, 1H), 4.04 – 3.93 (m, 1H), 3.83 (dd,  $J = 11.8, 2.2$  Hz, 1H), 3.62 – 3.55 (m, 3H), 3.32 – 3.17 (m, 7H), 3.15 (s, 9H), 3.14 – 3.08 (m, 2H), 1.63 – 1.50 (m, 2H).  $^{13}\text{C}$  NMR (101 MHz,  $\text{CD}_3\text{OD}$ )  $\delta$  182.52, 104.27, 78.31, 78.20, 74.93, 71.61, 67.03, 64.16, 62.72, 56.95, 54.79, 54.75, 54.71, 49.85, 42.37, 33.48, 26.45.

**[Carb][Hist]** yield: 74%.  $^1\text{H}$  NMR (400 MHz,  $\text{CD}_3\text{OD}$ )  $\delta$  7.58 (d,  $J = 1.0$  Hz, 1H), 6.88 (d,  $J = 1.0$  Hz, 1H), 4.37 (d,  $J = 7.8$  Hz, 1H), 4.33 (m, 1H), 4.06 (m, 1H), 3.92 (dd,  $J = 11.8, 2.2$  Hz, 1H), 3.67 (m, 3H), 3.46 (dd,  $J = 8.0, 4.7$  Hz, 1H), 3.39 (m, 1H), 3.34 – 3.31 (m, 2H), 3.27 (m, 1H), 3.22 (s, 9H), 3.07 (ddd,  $J = 14.7, 4.7, 0.8$  Hz, 1H), 2.81 (dd,  $J = 14.7, 8.0$  Hz, 1H).  $^{13}\text{C}$  NMR (101 MHz,  $\text{CD}_3\text{OD}$ )  $\delta$  181.18, 135.99, 134.16, 120.52, 104.22, 78.28, 78.08, 74.86, 71.53, 66.98, 64.17, 62.67, 57.55, 54.79, 54.76, 54.72, 33.39.

**[Carb][Trp]** yield: 87%. <sup>1</sup>H NMR (400 MHz, CD<sub>3</sub>OD) δ 7.75 – 7.69 (dt, J = 8.0, 1.8 Hz, 1H), 7.36 (dt, J = 8.0, 1.8 Hz, 1H), 7.18 (s, 1H), 7.11 (ddd, J = 8.0, 7.8, 1.2 Hz, 1H), 7.04 (ddd, J = 8.0, 7.8, 1.2 Hz, 1H), 4.36 (d, J = 7.8 Hz, 1H), 4.33 – 4.25 (m, 1H), 4.06 – 3.97 (m, 1H), 3.93 (dd, J = 11.8, 2.0 Hz, 1H), 3.69 (dd, J = 11.8, 2.0 Hz, 1H), 3.65 (dd, J = 8.4, 4.4 Hz, 1H), 3.62 – 3.56 (m, 2H), 3.43 – 3.38 (m, 1H), 3.36 – 3.25 (m, 3H), 3.24 – 3.19 (m, 1H), 3.17 (s, 9H), 3.04 – 2.96 (m, 1H). <sup>13</sup>C NMR (101 MHz, CD<sub>3</sub>OD) δ 180.28, 138.22, 128.97, 124.68, 122.41, 119.77, 119.65, 112.25, 111.80, 104.19, 78.25, 78.06, 74.85, 71.52, 66.94, 64.13, 62.65, 57.72, 54.74, 54.71, 54.67, 31.64.

**[Carb][Tyr]** yield: 76%. <sup>1</sup>H NMR (400 MHz, CD<sub>3</sub>OD) δ 7.03 (d, J = 8.5 Hz, 1H), 6.68 (d, J = 8.5 Hz, 1H), 4.37 (d, J = 7.8 Hz, 1H), 4.34 – 4.28 (m, 1H), 4.12 – 3.99 (m, 1H), 3.93 (dd, J = 11.8, 2.2 Hz, 1H), 3.68 (dd, J = 11.8, 5.9 Hz, 1H), 3.64 (m, 2H), 3.40 (m, 1H), 3.37 – 3.25 (m, 4H), 3.22 (s, 9H), 3.02 (dd, J = 13.5, 4.8 Hz, 1H), 2.65 (dd, J = 13.5, 8.4 Hz, 1H). <sup>13</sup>C NMR (101 MHz, CD<sub>3</sub>OD) δ 181.78, 160.76, 131.32, 128.30, 117.69, 104.22, 78.27, 78.08, 74.87, 71.55, 66.99, 64.16, 62.68, 59.15, 54.78, 54.75, 54.72, 42.05.

**Table 1.** Comparison of Knoevenagel process performance indicators achieved in the presence of different amino acid catalysts.

| Substrates                      | Catalyst                   | Catalyst loading | Solvent                   | Temp | Reaction Time    | Yield [%] | Ref.      |
|---------------------------------|----------------------------|------------------|---------------------------|------|------------------|-----------|-----------|
| Cinnamaldehyde + acetyl acetone | Glycine                    | 20%mol           | DMSO                      | RT   | 1h               | 15        | [2]       |
| Benzaldehyde + malononitrile    | Glycine                    | 20%mol           | [6-mim][PF <sub>6</sub> ] | RT   | 22h              | 77        | [3]       |
| Benzaldehyde + malononitrile    | Glycine                    | 20%mol           | [MMIm][MSO <sub>4</sub> ] | RT   | 70 min           | 98        | [4]       |
| Benzaldehyde + malononitrile    | ILs of amino acid amides   | 30%mol           | Solvent-free              | RT   | 30 min           | 97        | [5]       |
| Benzaldehyde + cyanoacetate     | [Chol][Gly]                | 1%mol            | Solvent-free              | RT   | 3h               | 74        | [6]       |
| Benzaldehyde + malononitrile    | [TBA][Leu]                 | 2.5%mol          | water                     | RT   | 30 min           | 89        | [7]       |
| Benzaldehyde + malononitrile    | [Carb][Gly]<br>[Carb][Trp] | 10%mol           | water                     | RT   | 30 min<br>15 min | 94<br>92  | This work |

**Figure 1. Biodegradation of carbohydrate/amino acid based IIs.**

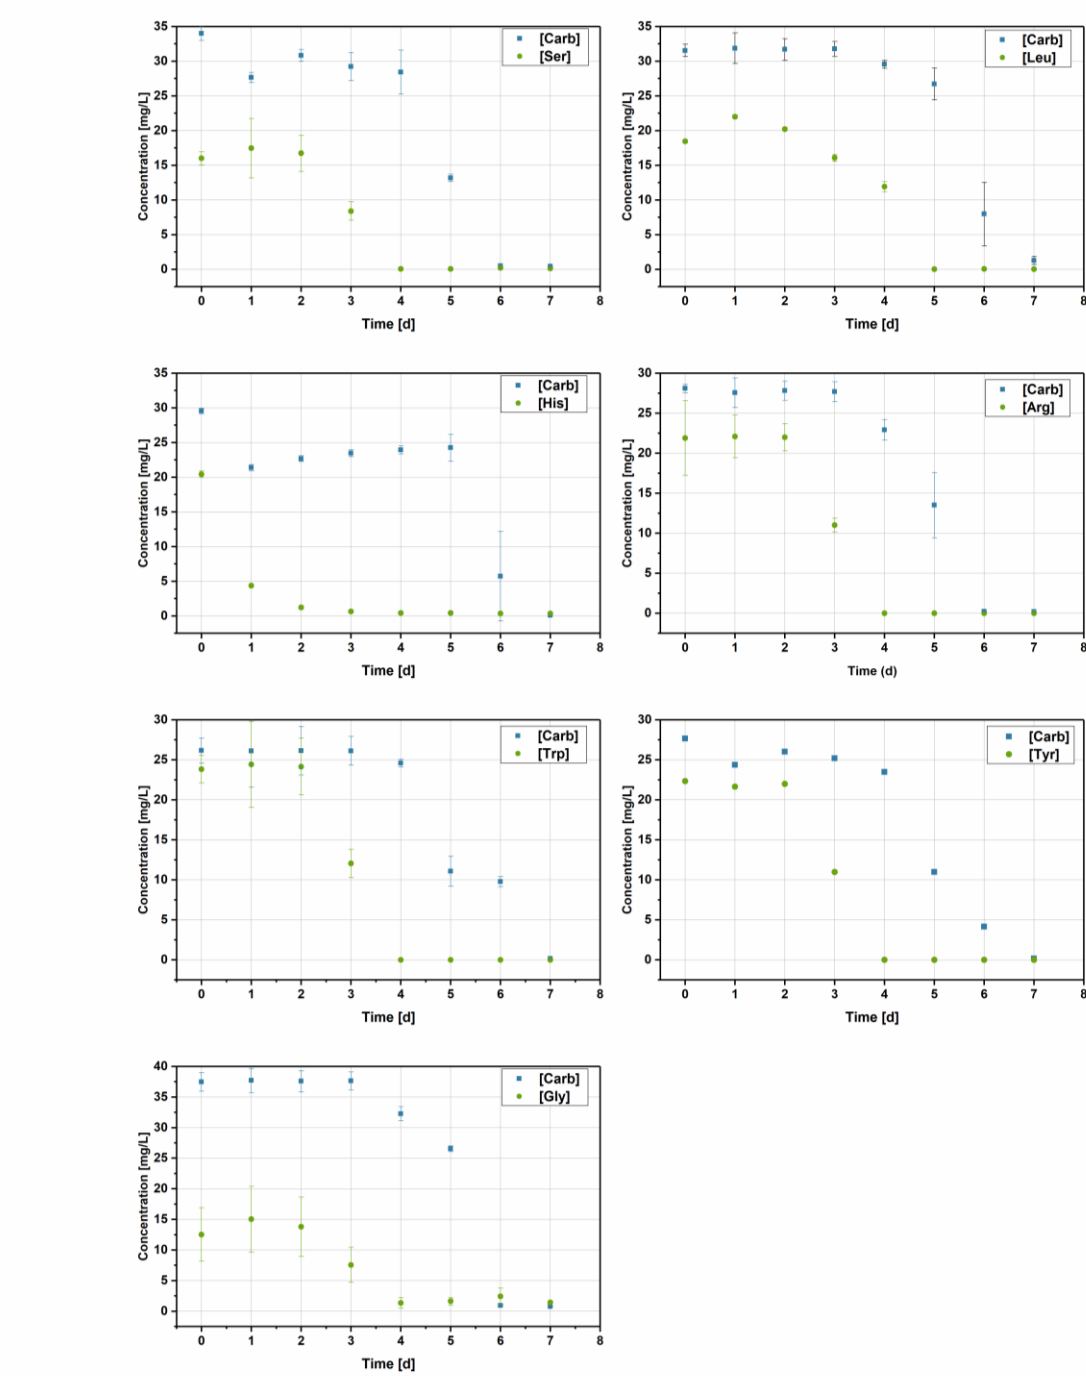

Figure 2.  $^1\text{H}$  and  $^{13}\text{C}$  NMR spectra of the [Carb][AAIL]s.

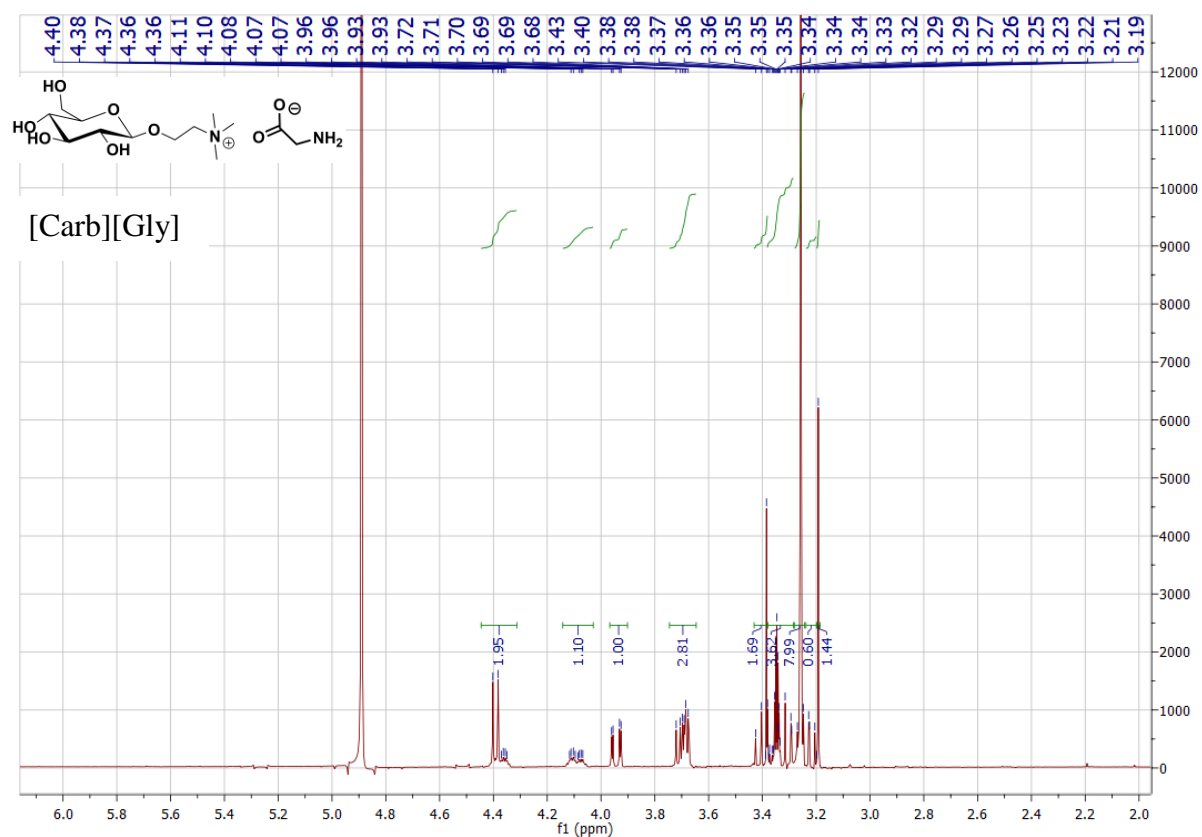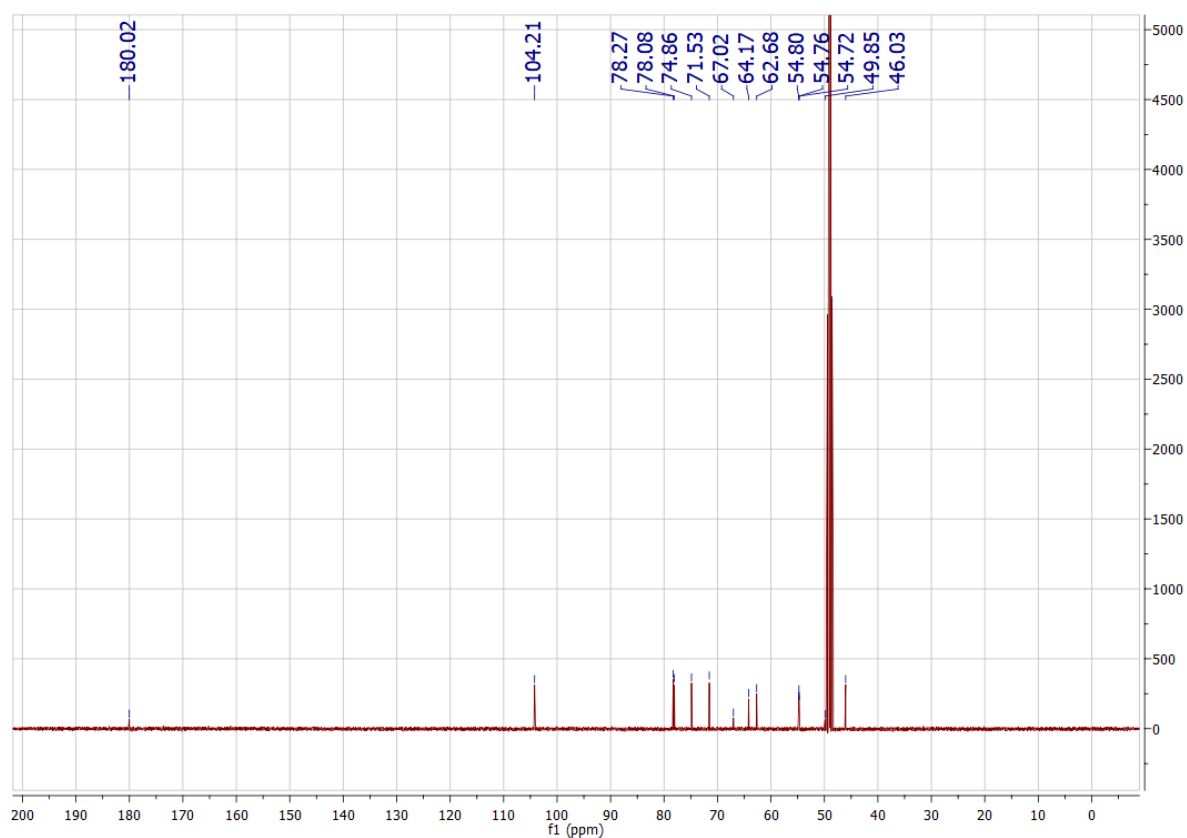

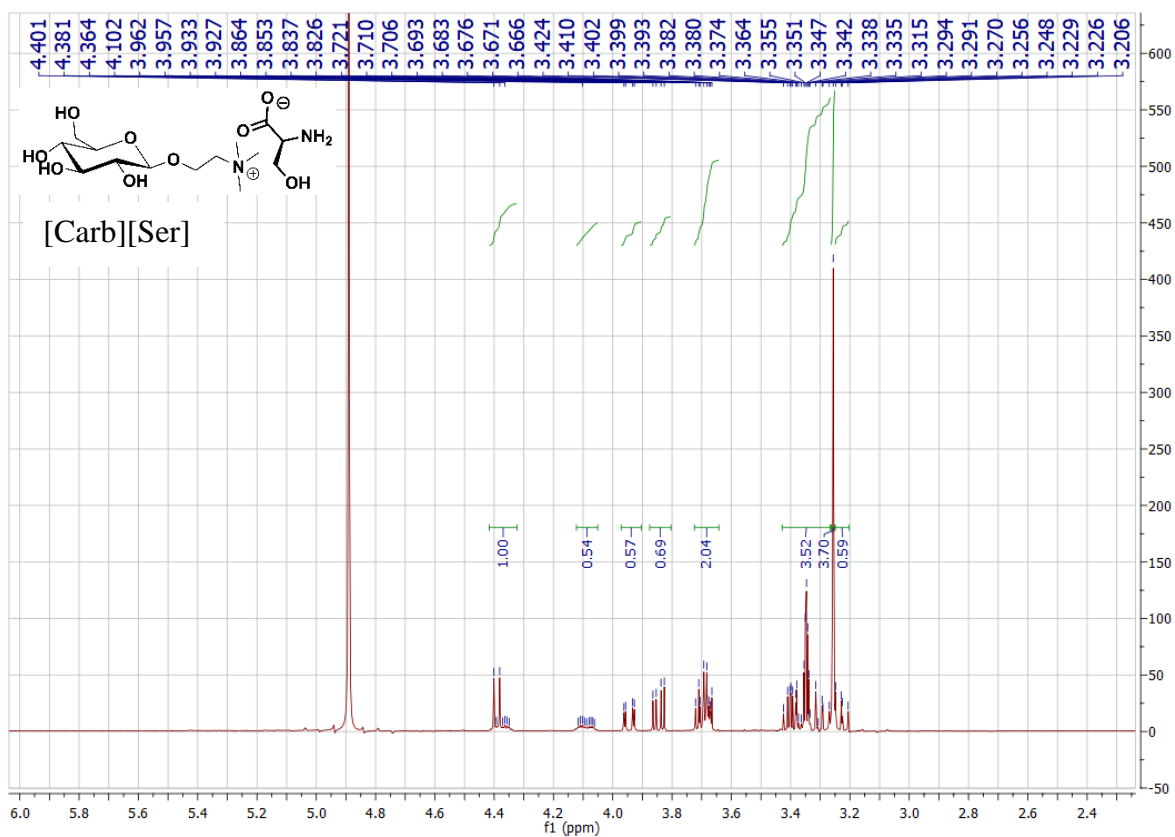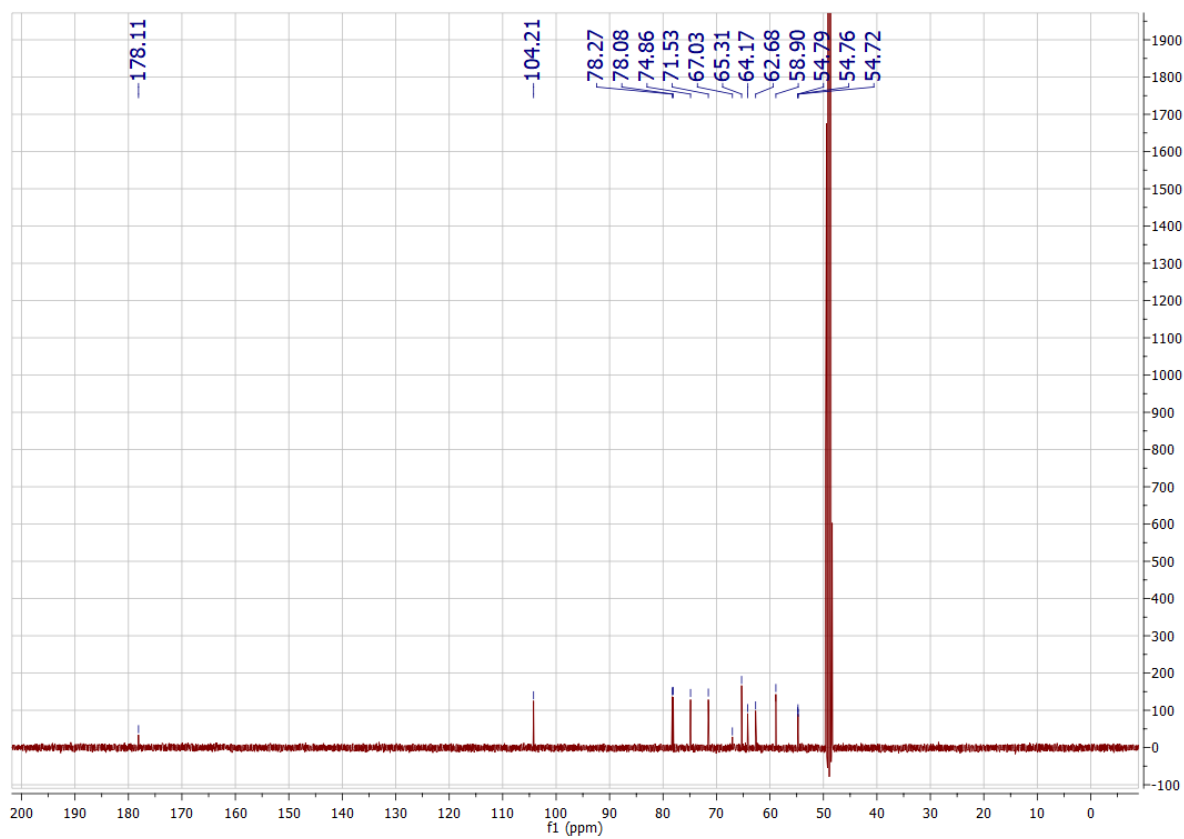



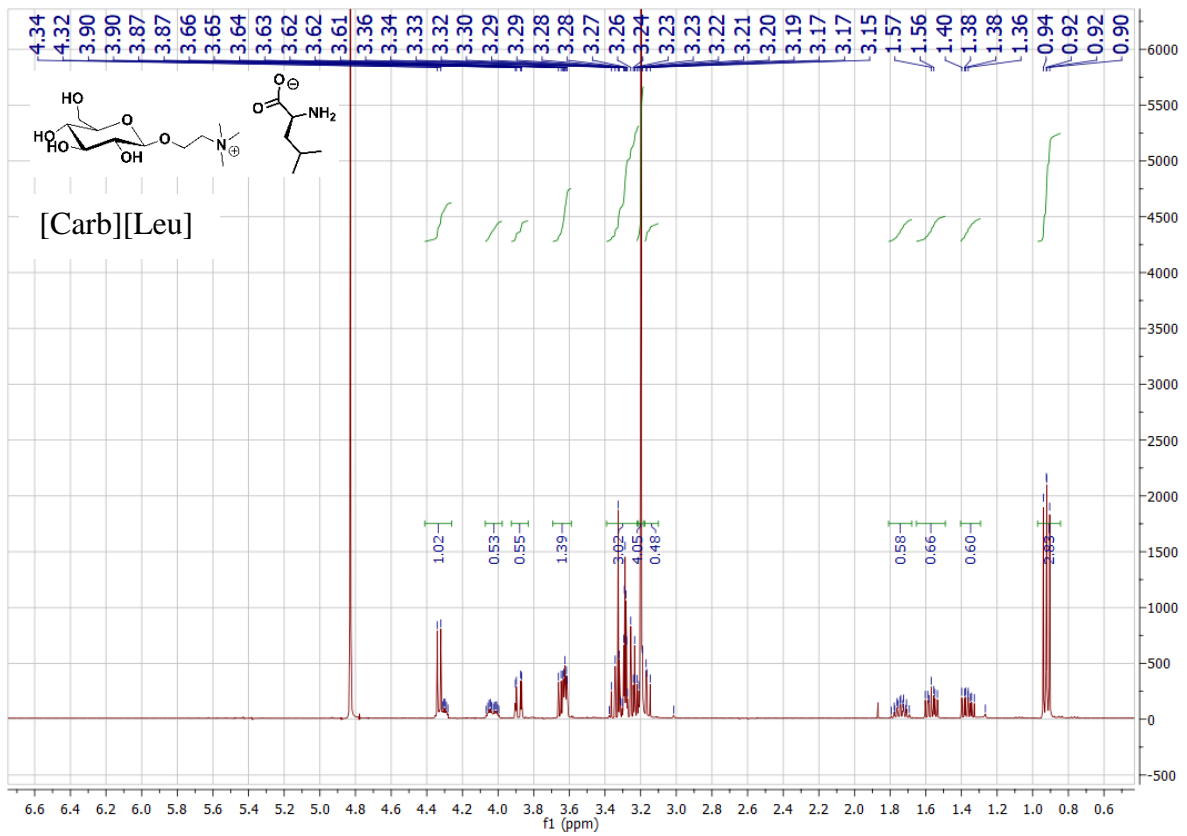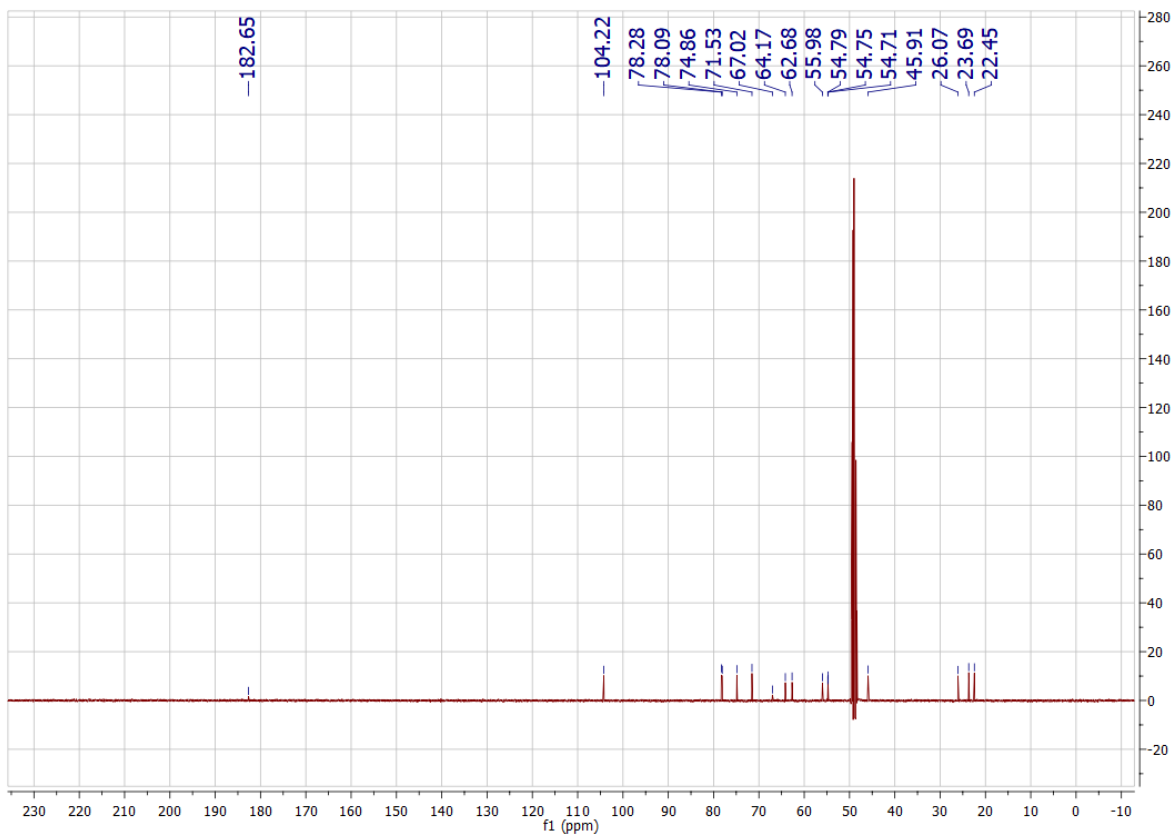

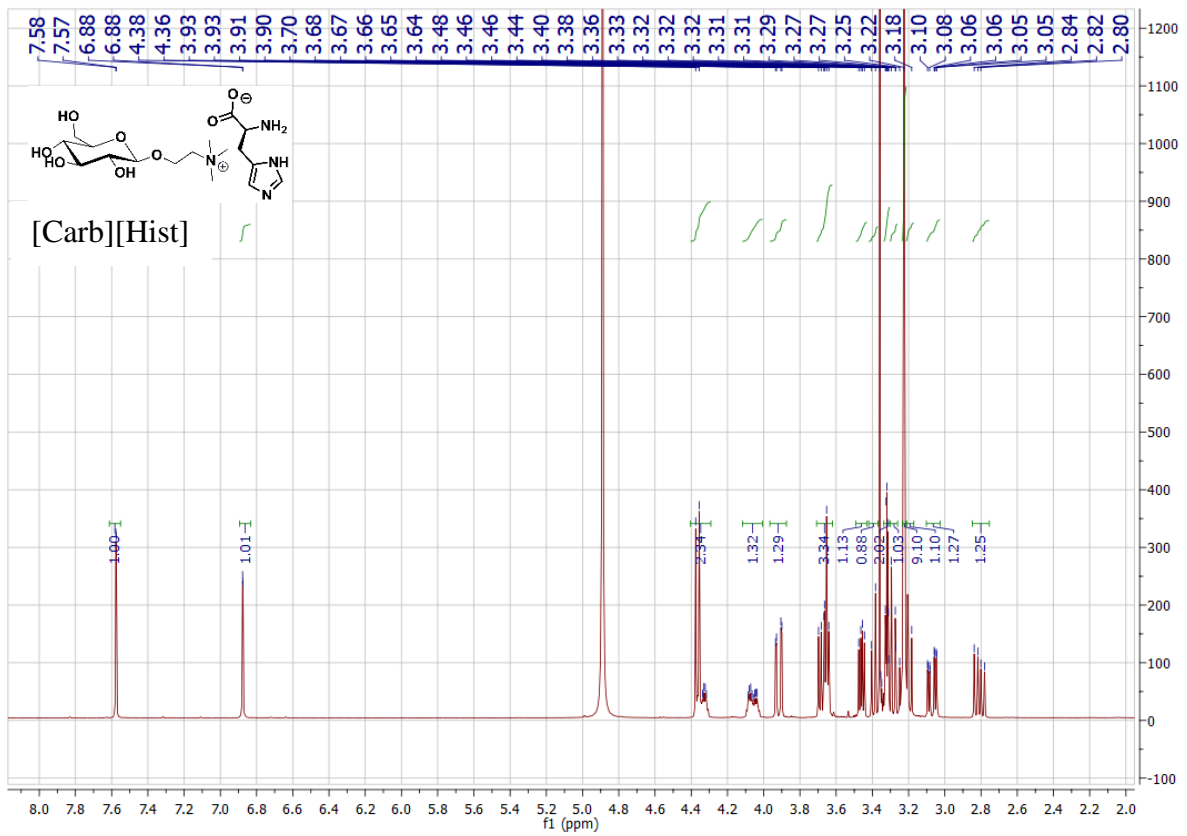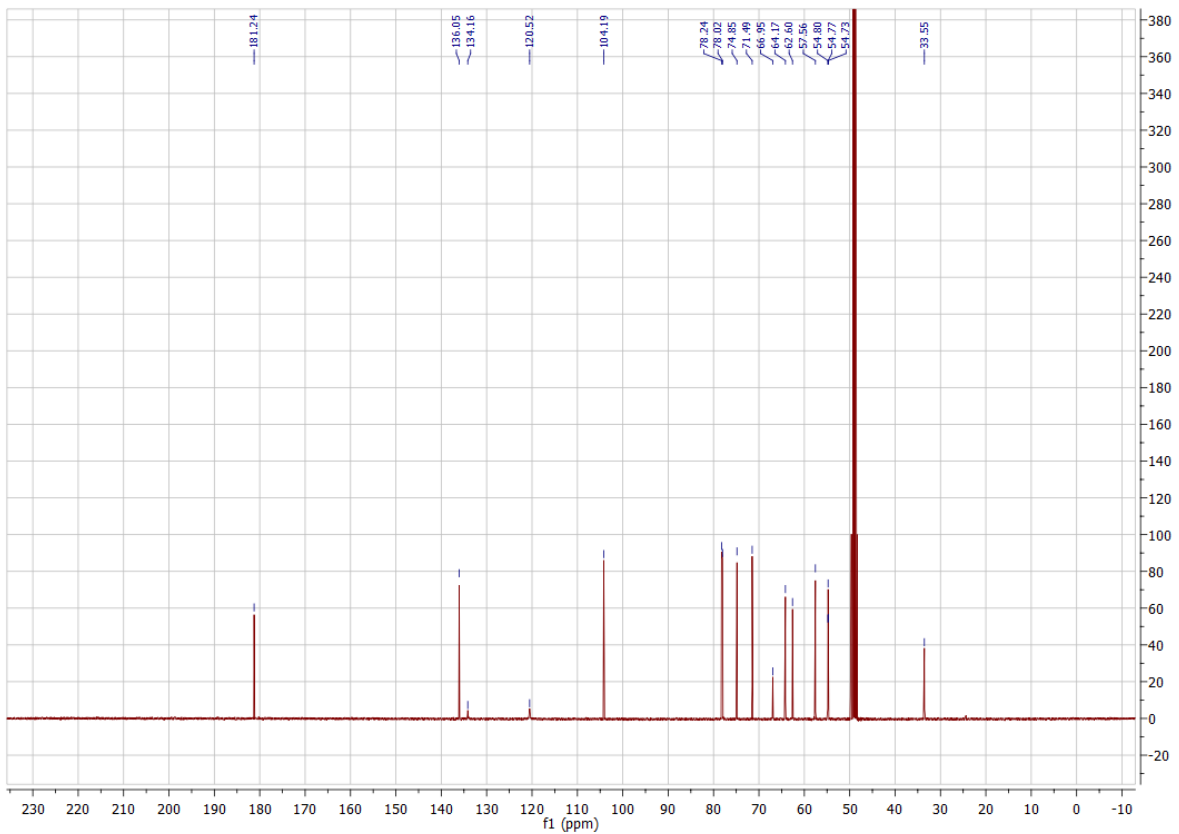

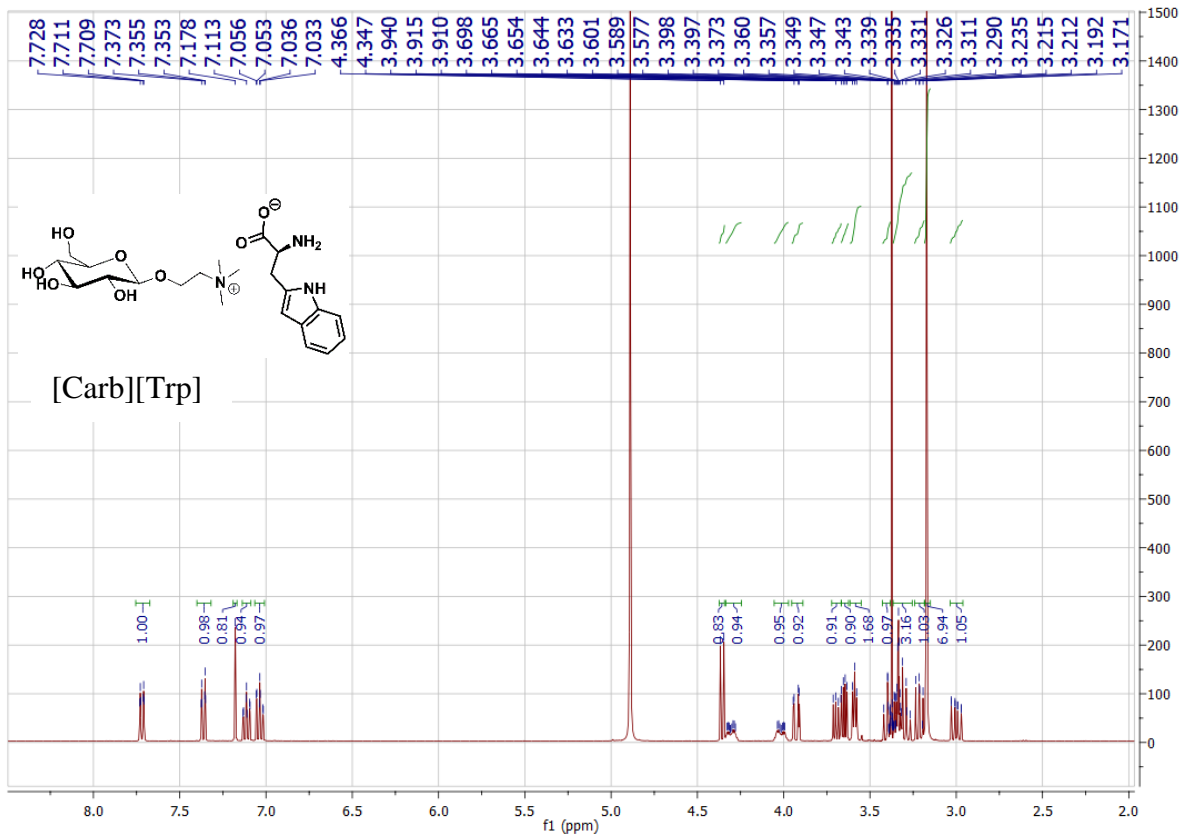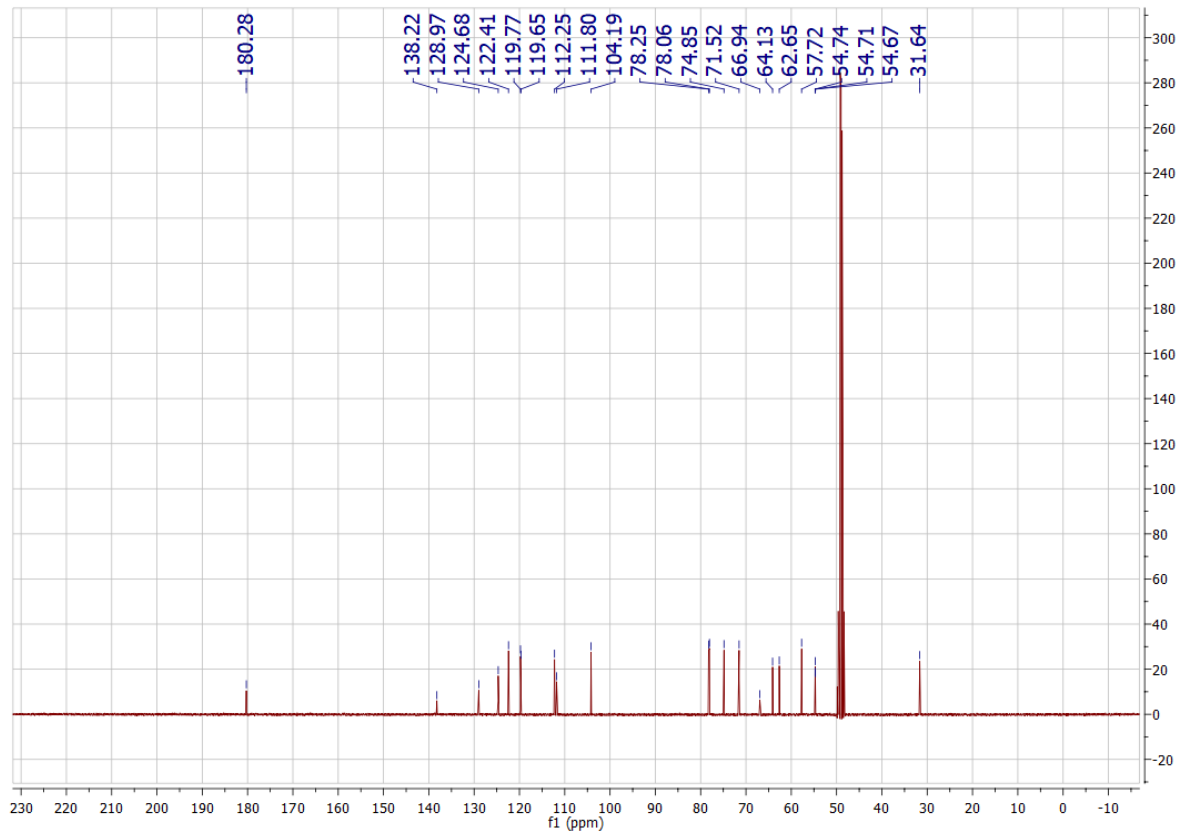

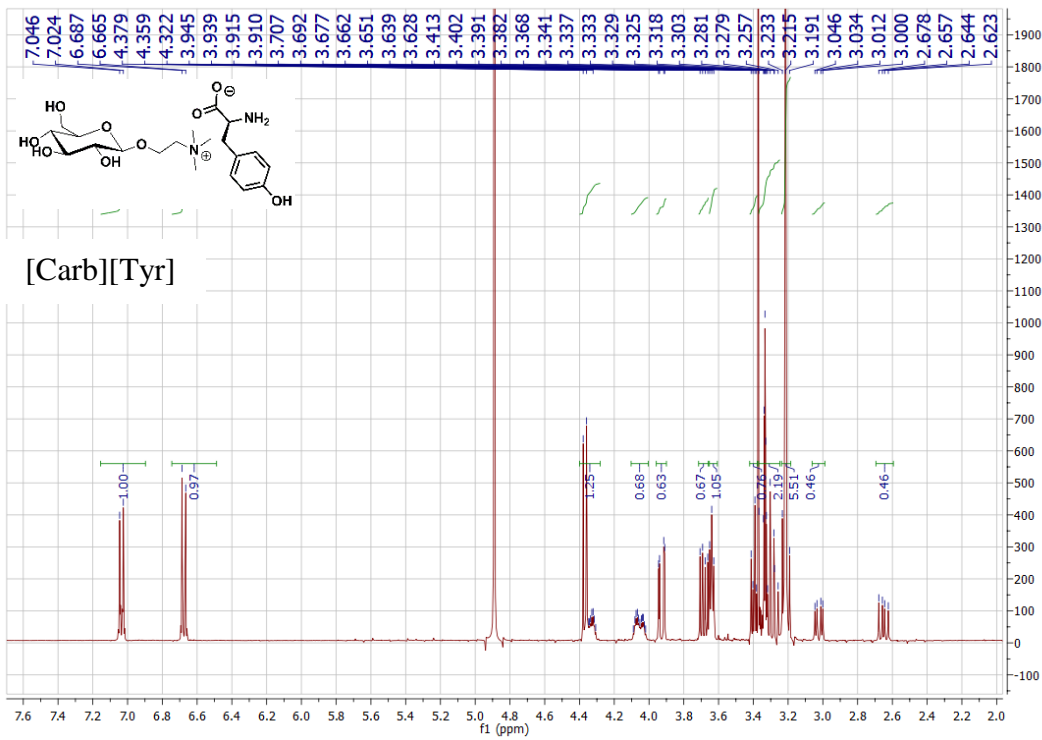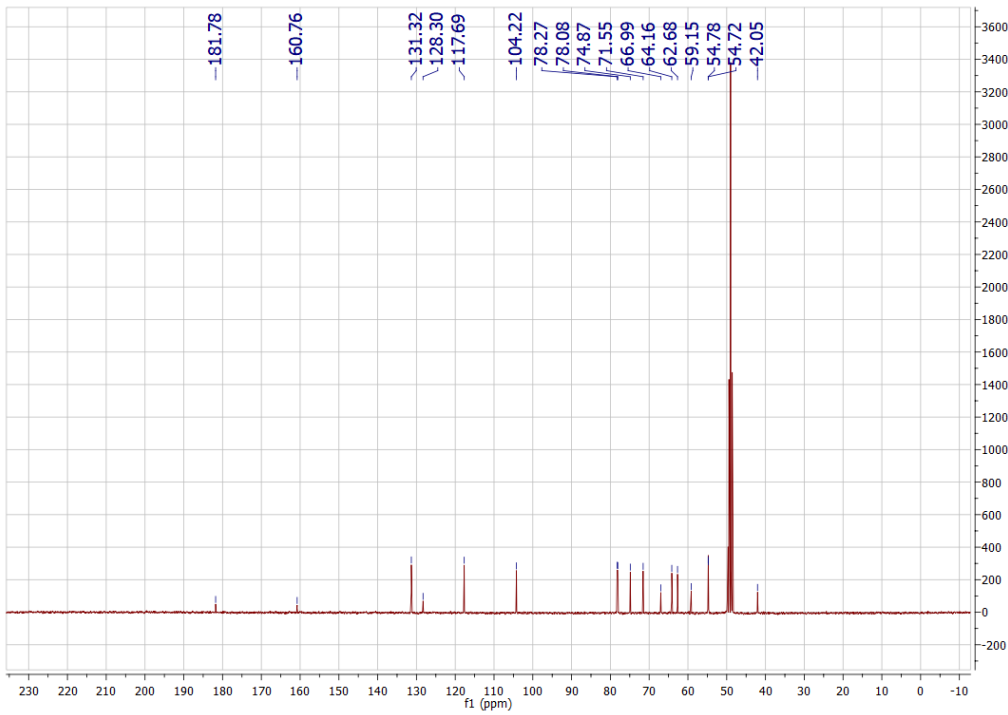

## References

- [1] Pernak, J.; Czerniak, K.; Biedziak, A.; Marcinkowska, K.; Praczyk, T.; Erfurt, K.; Chrobok, A. *RSC Advances* 6 (2016) 52781.
- [2] Y.-H. He, Y. Hu, Z. Guan, *Synthetic Communications* 41 (2011) 1617.
- [3] D.W. Morrison, D.C. Forbes, J.H. Davis Jr, *Tetrahedron Letters* 42 (2001) 6053.
- [4] F. Santamarta, P. Verdia, E. Tojo, *Catalysis Communications* 9 (2008) 1779.
- [5] P.A. Burate, B.R. Javle, P.H. Desale, A.K. Kinage, *Catalysis Letters* 149 (2019) 2368.
- [6] P. Moriel, E.J. Garcia-Suarez, M. Martinez, A.B. Garcia, M. Montes-Morán, V. Calvino-Casilda, M.A. Bañares, *Tetrahedron Letters* 51 (2010) 4877.
- [7] P. Ossowicz, Z. Rozwadowski, M. Gano, E. Janus, *Polish Journal of Chemical Technology* 18 (2016) 90.
